# Supplementary material
Source: PubMed Central journal article supplement (PMC3232447)
Supplement: NIHMS37953-supplement-Supp_Figs.pdf [file NIHMS37953-supplement-Supp_Figs.pdf]

## Supplementary Materials for

### UVB Irradiation–Induced Pain Is Mediated by CXCL5

John M. Dawes, Margarita Calvo, James R. Perkins, Kathryn J. Paterson, Hannes Keisewetter, Carl Hobbs, Timothy K. Y. Kaan, Christine Orengo, David L. H. Bennett, Stephen B. McMahon\*

\*To whom correspondence should be addressed. E-mail: stephen.mcmahon@kcl.ac.uk

Published 6 July 2011, *Sci. Transl. Med.* **3**, 90ra60 (2011)  
DOI: 10.1126/scitranslmed.3002193

#### The PDF file includes:

Fig. S1. Validation of up-regulated transcripts (as measured by PCR array cards) with qPCR.

Fig. S2. Correlation of PCR array data between male and female volunteers.

Fig. S3. The increased expression of CXCL5 mRNA is attenuated in the UVB model by piroxicam treatment.

Fig. S4. UVB-induced changes in female rats.

Table S1. Rat PCR array data.

Table S2. Human PCR array data.

Supplementary Material

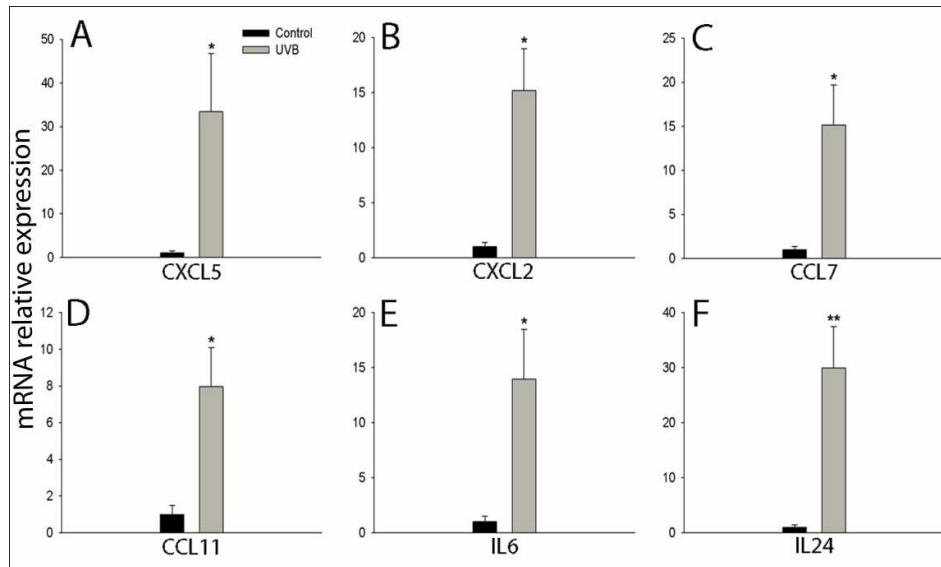

**Fig. S1. Validation of up-regulated transcripts (as measured by PCR array cards) with qPCR.** A significant increase in transcript levels was measured for CXCL5, CXCL2, CCL7, CCL11, IL6 and IL24 in UVB treated versus non-irradiated contralateral rat skin (A-F, respectively). Wilcoxon signed rank test (A), paired t-test (B-F), n=7. Mean  $\pm$  SEM, \*p<0.05 \*\*p<0.01.

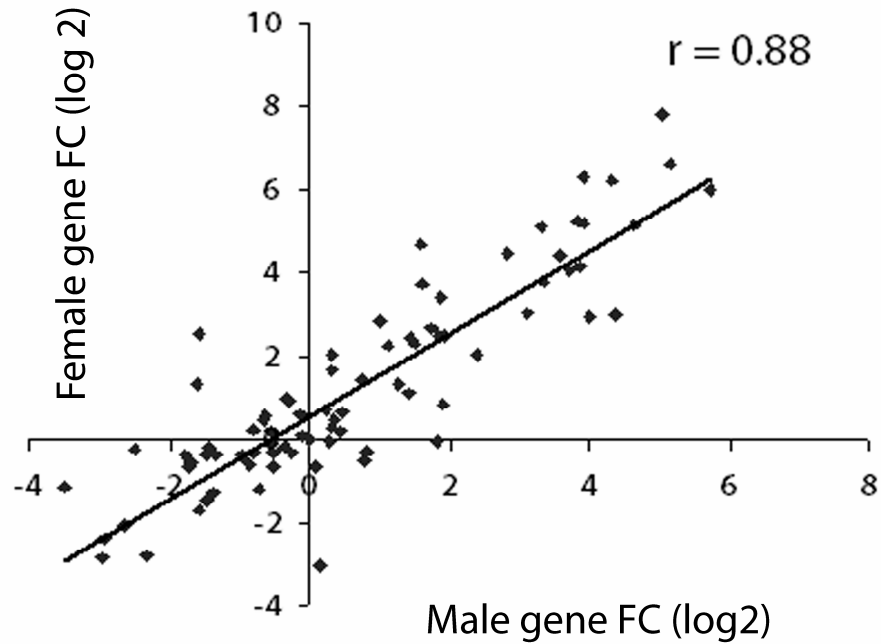

**Fig. S2. Correlation of PCR array data between male and female volunteers.**

Gene expression after UVB irradiation for male human subjects was plotted against the data from females. The Pearson's correlation coefficient,  $r = 0.88$ , showed that there is a strong positive relationship between the two data sets. This relationship is also significant with  $p < 0.001$ . (Males  $n=5$ , Female  $n=3$ , genes  $n=92$ ).

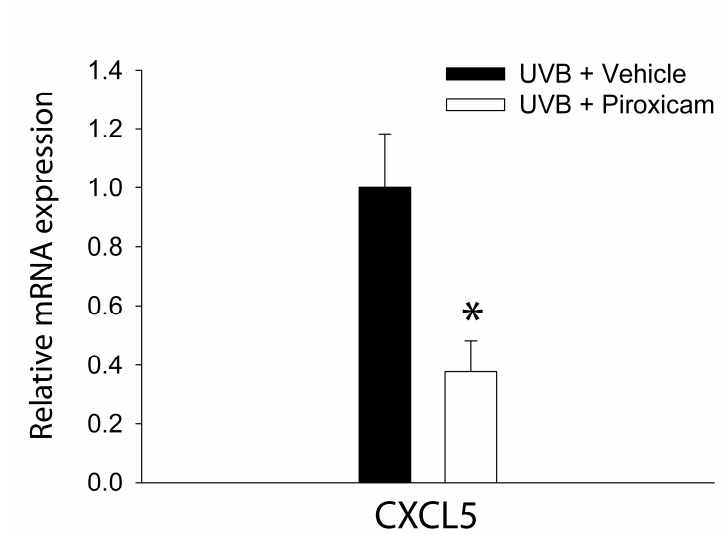

**Fig. S3. The increased expression of CXCL5 mRNA is attenuated in the UVB model by piroxicam treatment.** Just prior to irradiation and at 12, 24, 36 and 46 hours after UVB treatment, rats received an i.p. injection of either Piroxicam (Sigma, 10mg/kg) or vehicle (20% DMSO). Rats treated with Piroxicam had significantly reduced CXCL5 expression in UVB treated skin compared those in the vehicle group. (\* $p < 0.05$ , t-test,  $n = 4$ ). Data are presented as mean  $\pm$  SEM.

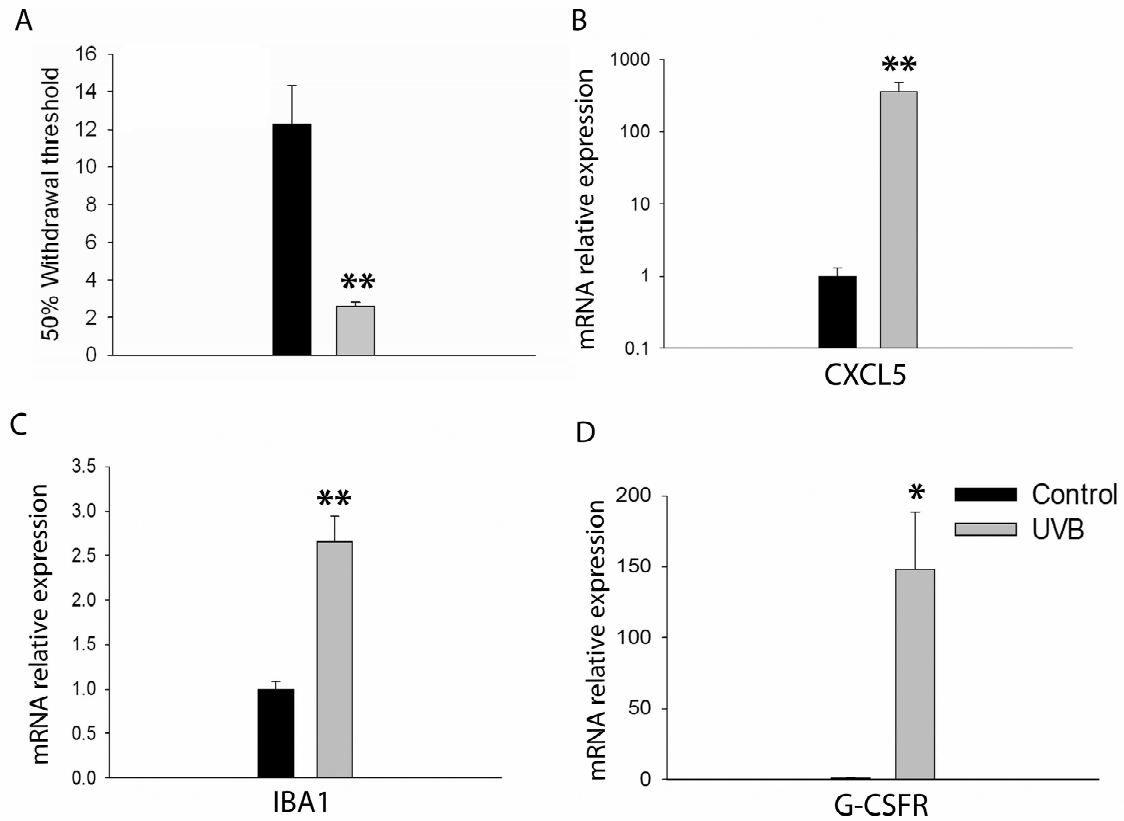

Fig. S4. UVB-induced changes in female rats. (A) Female rats developed a significant mechanical pain-related hypersensitivity 48 hours after UVB treatment. UVB treatment also significantly increased the mRNA expression of CXCL5 (B), IBA1 (C) and GCSFR (D). Paired t-test, \* $p < 0.05$ , \*\* $p < 0.01$ , paired t-test  $n = 6$ . All data are presented as the mean  $\pm$  SEM.

**Table S1. Rat PCR array data.**

| Applied Biosystem primer<br>code; Rat | Name                              | FC       |          |
|---------------------------------------|-----------------------------------|----------|----------|
|                                       |                                   | FINAL    | adjPVal  |
| Alox15-Rn00696151_m1                  | Arachidonate 15-Lipoxygenase      | 6.88504  | 0.121519 |
| Alox5-Rn00563172_m1                   | Arachidonate 5-lipoxygenase       | 2.117766 | 8.37E-05 |
| Areg-Rn00567471_m1                    | Amphiregulin                      | 0.90579  | 0.948159 |
| Artn-Rn01761472_g1                    | Artemin                           | 1.686631 | 0.035249 |
| Bdnf-Rn01484928_m1                    | Brain-derived neurotrophic factor | 2.47553  | 0.325985 |
| Btc-Rn00673281_m1                     | Betacellulin                      | 0.369867 | 0.338399 |
| C3-Rn00566466_m1                      | Complement component 3            | 4.971303 | 0.000131 |
| C5-Rn01436156_m1                      | Complement component 5            | 1.93606  | 0.443386 |
| Ccl1-Rn01752376_m1                    | Chemokine (C-C motif) ligand 1    | 0.354474 | 0.017597 |
| Ccl11-Rn00569995_m1                   | Chemokine (C-C motif) ligand 11   | 11.58508 | 4.51E-05 |
| Ccl17-Rn00589290_m1                   | Chemokine (C-C motif) ligand 17   | 1.142472 | 0.586833 |
| Ccl19-Rn01439563_m1                   | Chemokine (C-C motif) ligand 19   | 2.755498 | 0.016383 |
| Ccl2-Rn00580555_m1                    | Chemokine (C-C motif) ligand 2    | 14.66058 | 0.000221 |
| Ccl20-Rn00570287_m1                   | Chemokine (C-C motif) ligand 20   | 0.353528 | 0.058643 |
| Ccl21b-Rn01764651_g1                  | Chemokine (C-C motif) ligand 21b  | 0.755235 | 0.291932 |
| Ccl22-Rn01536591_m1                   | Chemokine (C-C motif) ligand 22   | 0.137293 | 1.14E-05 |
| Ccl24-Rn01481451_m1                   | Chemokine (C-C motif) ligand 24   | 1.344512 | 0.187421 |
| Ccl25-Rn01403351_m1                   | Chemokine (C-C motif) ligand 25   | 0.57458  | 0.44041  |

|                      |                                                         |          |          |
|----------------------|---------------------------------------------------------|----------|----------|
| Ccl26-Rn01481484_m1  | Chemokine (C-C motif) ligand 26                         | NA       | NA       |
| Ccl27-Rn01437037_m1  | Chemokine (C-C motif) ligand 27                         | NA       | NA       |
| Ccl28-Rn00586715_m1  | Chemokine (C-C motif) ligand 28                         | NA       | NA       |
| Ccl3-Rn00564660_m1   | Chemokine (C-C motif) ligand 3                          | 5.997417 | 0.007584 |
| Ccl4-Rn00587826_m1   | Chemokine (C-C motif) ligand 4                          | 15.35799 | 0.000137 |
| Ccl5-Rn00579590_m1   | Chemokine (C-C motif) ligand 5                          | 2.664209 | 0.099169 |
| Ccl6-Rn01456402_g1   | Chemokine (C-C motif) ligand 6                          | 2.455923 | 0.004211 |
| Ccl7-Rn01467286_m1   | Chemokine (C-C motif) ligand 7                          | 14.232   | 0.000131 |
| Ccl9-Rn01471276_m1   | Chemokine (C-C motif) ligand 9                          | 6.526384 | 0.000137 |
| Csf1-Rn00576849_m1   | Colony stimulating factor 1 (macrophage)                | 4.542358 | 1.14E-05 |
| Csf2-Rn01456851_m1   | Colony stimulating factor 2 (granulocyte-macrophage)    | 0.87465  | 0.918736 |
| Csf3-Rn00567344_m1   | Colony stimulating factor 3 (granulocyte)               | 7.089967 | 0.092509 |
| Cx3cl1-Rn00593186_m1 | Chemokine (C-X3-C motif) ligand 1                       | 0.472526 | 0.001883 |
| Cxcl1-Rn00578225_m1  | Chemokine (C-X-C motif) ligand 1                        | 5.410761 | 0.006414 |
| Cxcl10-Rn00594648_m1 | Chemokine (C-X-C motif) ligand 10                       | 2.225852 | 0.271036 |
| Cxcl11-Rn00788262_g1 | Chemokine (C-X-C motif) ligand 11                       | 3.133687 | 0.19442  |
| Cxcl12-Rn00573260_m1 | Chemokine (C-X-C motif) ligand 12                       | 1.576372 | 0.03271  |
| Cxcl13-Rn01450028_m1 | Chemokine (C-X-C motif) ligand 13                       | 3.053277 | 0.012622 |
| Cxcl14-Rn01441840_m1 | Chemokine (C-X-C motif) ligand 14                       | 1.885975 | 0.003849 |
| Cxcl16-Rn01496393_m1 | Chemokine (C-X-C motif) ligand 16                       | 1.221816 | 0.34029  |
| Cxcl17-Rn01764053_m1 | Chemokine (C-X-C motif) ligand 17                       | 0.95014  | 0.958139 |
| Cxcl2-Rn00586403_m1  | Chemokine (C-X-C motif) ligand 2                        | 24.6661  | 0.009162 |
| Cxcl3-Rn00593435_m1  | Chemokine (C-X-C motif) ligand 3                        | 2.05144  | 0.294366 |
| Cxcl5-Rn00573587_g1  | Chemokine (C-X-C motif) ligand 5                        | 51.28608 | 0.000171 |
| Cxcl9-Rn00595504_m1  | Chemokine (C-X-C motif) ligand 9                        | 1.0446   | 0.897726 |
| Ebi3-Rn01527778_m1   | Epstein-Barr virus induced gene 3                       | 4.03549  | 0.000469 |
| Edn1-Rn00561129_m1   | Endothelin 1                                            | 1.07337  | 0.897726 |
| Ereg-Rn00572454_m1   | Epiregulin                                              | 0.89458  | 0.918963 |
| Fgf7-Rn00573319_m1   | Fibroblast growth factor 7 (keratinocyte growth factor) | 5.80183  | 0.000183 |
| Hbegf-Rn00564075_m1  | Heparin-binding EGF-like growth factor                  | 4.28442  | 0.009229 |
| Ifn-g-Rn00594078_m1  | Interferon, gamma                                       | 0.58442  | 0.437389 |
| Il10-Rn01644839_m1   | Interleukin 10                                          | 10.6731  | 0.00088  |
| Il11-Rn00591721_m1   | Interleukin 11                                          | 0.66565  | 0.106098 |
| Il12a-Rn00584538_m1  | Interleukin 12a                                         | 0.536757 | 0.002136 |
| Il12b-Rn00575112_m1  | Interleukin 12b                                         | 0.277929 | 0.037099 |

|                         |                                                                                                    |          |          |
|-------------------------|----------------------------------------------------------------------------------------------------|----------|----------|
| Il13-Rn00587615_m1      | Interleukin 13                                                                                     | 1.01954  | 0.96705  |
| Il15-Rn00689964_m1      | Interleukin 15                                                                                     | 1.03152  | 0.946766 |
| Il16-Rn01477722_m1      | Interleukin 16                                                                                     | 0.80001  | 0.293906 |
| Il18-Rn01422083_m1      | Interleukin 18                                                                                     | 0.63103  | 0.184776 |
| Il19-Rn01490483_m1      | Interleukin 19                                                                                     | 6.17235  | 0.002319 |
| Il1a-Rn00566700_m1      | Interleukin 1 alpha                                                                                | 0.2102   | 0.000155 |
| Il1b-Rn00580432_m1      | Interleukin 1 beta                                                                                 | 4.9379   | 0.026934 |
| Il2-Rn99999181_m1       | Interleukin 2                                                                                      | NA       | NA       |
| Il20-Rn01483978_m1      | Interleukin 20                                                                                     | 0.05706  | 1.72E-05 |
| Il21-Rn01755623_m1      | Interleukin 21                                                                                     | 1.36465  | 0.506481 |
| Il23a-Rn00590334_g1     | Interleukin 23a                                                                                    | 1.48595  | 0.26231  |
| Il24-Rn00591159_m1      | Interleukin 24                                                                                     | 32.69474 | 0.000417 |
| Il27-Rn01510484_m1      | Interleukin 27                                                                                     | 1.075036 | 0.928099 |
| Il3-Rn00580435_m1       | Interleukin 3                                                                                      | 8.93579  | 0.001386 |
| Il33-Rn01759837_m1      | Interleukin 33                                                                                     | 2.398043 | 0.000198 |
| Il4-Rn01456866_m1       | Interleukin 4                                                                                      | NA       | NA       |
| Il5-Rn01459975_m1       | Interleukin 5                                                                                      | NA       | NA       |
| Il6-Rn00561420_m1       | Interleukin 6                                                                                      | 14.80302 | 0.001406 |
| Il7-Rn00681900_m1       | Interleukin 7                                                                                      | 1.297176 | 0.291932 |
| Il9-Rn01448718_m1       | Interleukin 9                                                                                      | NA       | NA       |
| Lif-Rn00573491_g1       | Leukemia inhibitory factor                                                                         | 21.35104 | 0.019041 |
| LOC301289-Rn01757168_m1 | Similar to Interleukin-17 precursor (IL-17) (Cytotoxic T lymphocyte-associated antigen 8) (CTLA-8) | NA       | NA       |
| LOC682457-Rn01516136_m1 | Taxilin alpha (interleukin 14)                                                                     | 0.866346 | 0.410661 |
| Lta4h-Rn01503878_m1     | Leukotriene A4 hydrolase                                                                           | 0.980934 | 0.928099 |
| Mif-Rn00821234_g1       | Macrophage migration inhibitory factor                                                             | 1.125275 | 0.291932 |
| Ngf-Rn01533872_m1       | Nerve growth factor (beta polypeptide)                                                             | 1.41969  | 0.198758 |
| Nos2-Rn00561646_m1      | Nitric oxide synthase 2, inducible                                                                 | 34.29193 | 0.010603 |
| Pf4-Rn01768298_g1       | Platelet factor 4 (CXCL4)                                                                          | 5.986383 | 1.72E-05 |
| Ppbp-Rn00596603_g1      | Pro-platelet basic protein (chemokine (C-X-C motif) ligand 7)                                      | 14.02202 | 0.007272 |
| Ptges-Rn00572047_m1     | Prostaglandin E synthase                                                                           | 1.057634 | 0.918736 |
| Ptgis-Rn00580687_m1     | Prostaglandin I2 (prostacyclin) synthase                                                           | 4.254087 | 0.000198 |
| Ptgs2-Rn01483828_m1     | Prostaglandin-endoperoxide synthase 2 (cyclooxygenase-2)                                           | 4.60403  | 0.00309  |
| Tgfb1-Rn00572010_m1     | Transforming growth factor, beta 1                                                                 | 1.792186 | 0.014843 |



|                    |                              |          |          |
|--------------------|------------------------------|----------|----------|
| Tnf-Rn99999017_m1  | Tumor necrosis factor        | 1.52635  | 0.191037 |
| Xcl1-Rn00592605_m1 | Chemokine (C motif) ligand 1 | 1.255277 | 0.827178 |

**Table S2. Human PCR array data.**

| Applied Biosystem primer code;<br>Human | Name                              | FC<br>FINAL | adjPVal  |
|-----------------------------------------|-----------------------------------|-------------|----------|
| ARTN.Hs00365083_m1                      | Artemin                           | 2.6461      | 0.353896 |
| BDNF.Hs00538277_m1                      | Brain-derived neurotrophic factor | NA          | NA       |
| CCL1.Hs00171072_m1                      | Chemokine (C-C motif) ligand 1    | 0.9809      | 0.985747 |
| CCL11.Hs00237013_m1                     | Chemokine (C-C motif) ligand 11   | 4.238       | 0.050675 |
| CCL13.Hs00234646_m1                     | Chemokine (C-C motif) ligand 12   | 1.060357    | 0.869089 |
| CCL14.CCL15.Hs00263137_m1               | Chemokine (C-C motif) ligand 14   | 0.3859      | 0.279173 |
| CCL16.Hs00171123_m1                     | Chemokine (C-C motif) ligand 16   | NA          | NA       |
| CCL17.Hs00171074_m1                     | Chemokine (C-C motif) ligand 17   | 0.482628    | 0.143367 |
| CCL18.Hs00268113_m1                     | Chemokine (C-C motif) ligand 18   | 6.602753    | 6.12E-05 |
| CCL19.Hs00171149_m1                     | Chemokine (C-C motif) ligand 19   | 3.581412    | 2.29E-05 |
| CCL2.Hs00234140_m1                      | Chemokine (C-C motif) ligand 2    | 5.134987    | 1.27E-06 |
| CCL20.Hs00171125_m1                     | Chemokine (C-C motif) ligand 20   | 23.54027    | 0.000138 |
| CCL21.Hs00171076_m1                     | Chemokine (C-C motif) ligand 21   | 2.986324    | 9.96E-06 |
| CCL22.Hs01574247_m1                     | Chemokine (C-C motif) ligand 22   | 0.794794    | 0.374059 |
| CCL23.Hs00270756_m1                     | Chemokine (C-C motif) ligand 23   | 1.454472    | 0.504555 |
| CCL24.Hs00171082_m1                     | Chemokine (C-C motif) ligand 24   | 0.955848    | 0.987641 |
| CCL25.Hs00171144_m1                     | Chemokine (C-C motif) ligand 25   | NA          | NA       |
| CCL26.Hs00171146_m1                     | Chemokine (C-C motif) ligand 26   | 1.169531    | 0.595442 |
| CCL27.Hs00171157_m1                     | Chemokine (C-C motif) ligand 27   | 0.16084     | 0.000134 |
| CCL28.Hs00219797_m1                     | Chemokine (C-C motif) ligand 28   | 0.474908    | 0.029053 |
| CCL3.Hs00234142_m1                      | Chemokine (C-C motif) ligand 3    | 16.61471    | 0.000406 |
| CCL4.Hs99999148_m1                      | Chemokine (C-C motif) ligand 4    | 2.477342    | 0.027524 |
| CCL5.Hs00982282_m1                      | Chemokine (C-C motif) ligand 5    | 1.342267    | 0.330106 |
| CCL7.Hs00171147_m1                      | Chemokine (C-C motif) ligand 7    | 13.7573     | 0.000604 |

|                      |                                                          |          |          |
|----------------------|----------------------------------------------------------|----------|----------|
| CCL8.Hs00271615_m1   | Chemokine (C-C motif) ligand 8                           | 18.3125  | 0.000312 |
| CSF1.Hs00174164_m1   | Colony stimulating factor 1 (macrophage)                 | 0.713    | 0.000466 |
| CSF2.Hs00929873_m1   | Colony stimulating factor 2 (granulocyte-macrophage)     | 0.8536   | 0.893814 |
| CSF3.Hs99999083_m1   | Colony stimulating factor 3 (granulocyte)                | 25.0016  | 1.34E-05 |
| CX3CL1.Hs00171086_m1 | Chemokine (C-X3-C motif) ligand 1                        | 0.930983 | 0.859033 |
| CXCL1.Hs00236937_m1  | Chemokine (C-X-C motif) ligand 1                         | 18.93007 | 9.96E-06 |
| CXCL10.Hs00171042_m1 | Chemokine (C-X-C motif) ligand 10                        | 6.408928 | 0.005326 |
| CXCL11.Hs00171138_m1 | Chemokine (C-X-C motif) ligand 11                        | 17.9134  | 0.004117 |
| CXCL12.Hs00930455_m1 | Chemokine (C-X-C motif) ligand 12                        | 0.914819 | 0.708647 |
| CXCL13.Hs00171152_m1 | Chemokine (C-X-C motif) ligand 13                        | NA       | NA       |
| CXCL14.Hs00171135_m1 | Chemokine (C-X-C motif) ligand 14                        | 0.183163 | 1.03E-05 |
| CXCL16.Hs00222859_m1 | Chemokine (C-X-C motif) ligand 16                        | 1.605064 | 6.21E-05 |
| CXCL17.Hs01650998_m1 | Chemokine (C-X-C motif) ligand 17                        | 8.841316 | 3.31E-05 |
| CXCL2.Hs00601975_m1  | Chemokine (C-X-C motif) ligand 2                         | 11.97302 | 2.66E-06 |
| CXCL3.Hs00171061_m1  | Chemokine (C-X-C motif) ligand 3                         | 13.25804 | 9.96E-06 |
| CXCL5.Hs00171085_m1  | Chemokine (C-X-C motif) ligand 5                         | 82.5431  | 2.42E-05 |
| CXCL6.Hs00237017_m1  | Chemokine (C-X-C motif) ligand 6                         | 5.1695   | 0.000751 |
| CXCL9.Hs00171065_m1  | Chemokine (C-X-C motif) ligand 9                         | 2.997007 | 0.089332 |
| EBI3.Hs00194957_m1   | Epstein-Barr virus induced gene 3                        | 1.634374 | 0.331126 |
| EDN1.Hs00174961_m1   | Endothelin 1                                             | 1.544138 | 0.046452 |
| FGF7.Hs00384281_m1   | Fibroblast growth factor 7 or Keratinocyte growth factor | 4.295042 | 3.26E-05 |
| IL10.Hs00961619_m1   | Interleukin 10                                           | 8.004645 | 0.000227 |
| IL11.Hs00174148_m1   | Interleukin 11                                           | 1.602822 | 0.534722 |
| IL12A.Hs00168405_m1  | Interleukin 12 subunit alpha                             | 0.922416 | 0.26542  |
| IL12B.Hs01011519_m1  | Interleukin 12 subunit beta                              | 0.612841 | 0.670373 |
| IL13.Hs00174379_m1   | Interleukin 13                                           | NA       | NA       |
| IL15.Hs00174106_m1   | Interleukin 15                                           | NA       | NA       |
| IL16.Hs00189606_m1   | Interleukin 16                                           | 0.508381 | 0.000173 |
| IL17A.Hs00174383_m1  | Interleukin 17                                           | NA       | NA       |
| IL18.Hs00155517_m1   | Interleukin 18                                           | 0.226523 | 0.000277 |
| IL19.Hs00203540_m1   | Interleukin 19                                           | NA       | NA       |
| IL1A.Hs99999028_m1   | Interleukin 1 alpha                                      | 5.758932 | 0.000405 |
| IL1B.Hs99999029_m1   | Interleukin 1 beta                                       | 10.25314 | 2.24E-05 |
| IL2.Hs00174114_m1    | Interleukin 2                                            | NA       | NA       |
| IL20.Hs00218888_m1   | Interleukin 20                                           | 30.30539 | 0.00031  |

|                         |                                                               |          |          |
|-------------------------|---------------------------------------------------------------|----------|----------|
| IL21.Hs00222327_m1      | Interleukin 21                                                | NA       | NA       |
| IL22.Hs00220924_m1      | Interleukin 22                                                | NA       | NA       |
| IL23A.Hs00372324_m1     | Interleukin 23 subunit alpha                                  | 2.598294 | 0.048746 |
| IL24.Hs00169533_m1      | Interleukin 24                                                | 63.731   | 1.58E-05 |
| IL25.Hs00224471_m1      | Interleukin 25                                                | 0.2843   | 0.039623 |
| IL26.Hs00218189_m1      | Interleukin 26                                                | NA       | NA       |
| IL27.Hs00377366_m1      | Interleukin 27                                                | NA       | NA       |
| IL28A.Hs00820125_g1     | Interleukin 28A                                               | NA       | NA       |
| IL29.Hs00601677_g1      | Interleukin 29                                                | NA       | NA       |
| IL3.Hs00174117_m1       | Interleukin 3                                                 | NA       | NA       |
| IL31.Hs01098710_m1      | Interleukin 31                                                | NA       | NA       |
| IL32.Hs00170403_m1      | Interleukin 32                                                | 1.00266  | 0.988908 |
| IL33.Hs00369211_m1      | Interleukin 33                                                | 1.177459 | 0.527756 |
| IL34.Hs00380956_m1      | Interleukin 34                                                | 0.215375 | 4.75E-07 |
| IL4.Hs00929862_m1       | Interleukin 4                                                 | NA       | NA       |
| IL5.Hs00174200_m1       | Interleukin 5                                                 | NA       | NA       |
| IL6.Hs00985641_m1       | Interleukin 6                                                 | 54.7143  | 1.03E-05 |
| IL7.Hs00174202_m1       | Interleukin 7                                                 | 0.44248  | 0.019158 |
| IL8.Hs99999034_m1       | Interleukin 8                                                 | 71.07711 | 9.96E-06 |
| IL9.Hs00174125_m1       | Interleukin 9                                                 | NA       | NA       |
| MIF.Hs00236988_g1       | Macrophage migration inhibitory factor                        | 1.009424 | 0.972349 |
| NGF.Hs00171458_m1       | Nerve growth factor (beta polypeptide)                        | 1.724755 | 0.0503   |
| NOS2.Hs00167248_m1      | Nitric oxide synthase 2, inducible                            | 0.899343 | 0.938789 |
| PF4.Hs00236998_m1       | Platelet factor 4 (chemokine(C-X-C motif) ligand 4)           | 2.132868 | 0.204972 |
| PPBP.Hs00234077_m1      | Pro-platelet basic protein (chemokine (C-X-C motif) ligand 7) | 3.955725 | 0.08414  |
| PTGES.Hs00610420_m1     | Prostaglandin E synthase                                      | 2.452527 | 0.000123 |
| PTGS2.Hs00153133_m1     | Prostaglandin-endoperoxide synthase 2 (cyclooxygenase-2)      | 5.346755 | 0.000227 |
| TNF.Hs00174128_m1       | Tumor necrosis factor                                         | 1.334291 | 0.112972 |
| TXLNA.Hs00233304_m1     | Taxilin alpha                                                 | 0.830072 | 0.270347 |
| XCL1.XCL2.Hs00237019_m1 | Chemokine (C motif) ligand 1                                  | 1.034097 | 0.972349 |
